# Supplementary material for: Practical Therapeutic Options for Postoperative Chylothorax
Source: Research Square preprint supplement (doi:10.21203/rs.3.rs-7919123/v1), 2026-01-22
Supplement: Supplementary file 1 [file 1245d9a0e51a49b7ad9677c5.docx]

| **Characteristic**  **Supplementary Table 1. Variables Associated with Chylothorax Recurrence Recurrence** | **Overall** N = 69*1* | **Chylothorax Recurrence** | | **p-value***2* |
| --- | --- | --- | --- | --- |
| **NO** N = 62*1* | **YES** N = 7*1* |
| Age1 | 69 (56, 74) | 69 (55, 74) | 69 (59, 74) | >0.9 |
| Sex |  |  |  | 0.4 |
| Female | 31 (100%) | 29 (94%) | 2 (6.5%) |  |
| Male | 38 (100%) | 33 (87%) | 5 (13%) |  |
| Smoker |  |  |  | >0.9 |
| Current | 21 (100%) | 19 (90%) | 2 (9.5%) |  |
| Former | 34 (100%) | 30 (88%) | 4 (12%) |  |
| Never | 14 (100%) | 13 (93%) | 1 (7.1%) |  |
| Diabetes |  |  |  | >0.9 |
| No | 65 (100%) | 58 (89%) | 7 (11%) |  |
| Yes | 4 (100%) | 4 (100%) | 0 (0%) |  |
| BMI1 | 25.0 (21.9, 28.3) | 25.0 (21.0, 28.3) | 23.2 (21.9, 29.0) | 0.6 |
| Cell Type |  |  |  | 0.069 |
| Adenocarcinoma | 41 (100%) | 38 (93%) | 3 (7.3%) |  |
| Benign | 1 (100%) | 1 (100%) | 0 (0%) |  |
| Carcinoid | 2 (100%) | 2 (100%) | 0 (0%) |  |
| Metastatic renal cell | 1 (100%) | 1 (100%) | 0 (0%) |  |
| Metastatic sarcoma | 1 (100%) | 1 (100%) | 0 (0%) |  |
| Necrotizing granuloma | 1 (100%) | 0 (0%) | 1 (100%) |  |
| NSCLC | 5 (100%) | 4 (80%) | 1 (20%) |  |
| Small cell | 1 (100%) | 0 (0%) | 1 (100%) |  |
| Squamous cell | 16 (100%) | 15 (94%) | 1 (6.3%) |  |
| Positive N2 disease |  |  |  | 0.3 |
| No | 56 (100%) | 49 (88%) | 7 (13%) |  |
| Yes | 13 (100%) | 13 (100%) | 0 (0%) |  |
| Lung Resection |  |  |  | 0.2 |
| No | 17 (100%) | 17 (100%) | 0 (0%) |  |
| Yes | 52 (100%) | 45 (87%) | 7 (13%) |  |
| Surgery type |  |  |  | >0.9 |
| Open | 35 (100%) | 31 (89%) | 4 (11%) |  |
| Robotic | 34 (100%) | 31 (91%) | 3 (8.8%) |  |
| Surgical Ligation |  |  |  | 0.4 |
| No | 49 (100%) | 45 (92%) | 4 (8.2%) |  |
| Yes | 20 (100%) | 17 (85%) | 3 (15%) |  |
| Octreotide |  |  |  | 0.7 |
| No | 51 (100%) | 45 (88%) | 6 (12%) |  |
| Yes | 18 (100%) | 17 (94%) | 1 (5.6%) |  |
| MCT diet |  |  |  | >0.9 |
| No | 54 (100%) | 48 (89%) | 6 (11%) |  |
| Yes | 15 (100%) | 14 (93%) | 1 (6.7%) |  |
| Lymphangiogram |  |  |  | 0.2 |
| No | 60 (100%) | 55 (92%) | 5 (8.3%) |  |
| Yes | 9 (100%) | 7 (78%) | 2 (22%) |  |
| Midodrine |  |  |  | >0.9 |
| No | 53 (100%) | 47 (89%) | 6 (11%) |  |
| Yes | 16 (100%) | 15 (94%) | 1 (6.3%) |  |
| TPN |  |  |  | 0.5 |
| No | 62 (100%) | 56 (90%) | 6 (9.7%) |  |
| Yes | 7 (100%) | 6 (86%) | 1 (14%) |  |
| *1* Median (Q1, Q3); n (%) | | | | |
| *2* Wilcoxon rank sum test; Fisher’s exact test | | | | |

Abbreviations: BMI=Body Mass Index: MCT=medium chain triglyceride diet; NSCLC=non-small cell lung cancer; TPN=total parenteral nutrition
