# Supplementary material for: Practical Therapeutic Options for Postoperative Chylothorax
Source: Research Square preprint supplement (doi:10.21203/rs.3.rs-7919123/v1), 2026-01-22
Supplement: Supplementary file 2 [file 2495d1c7a665ecb6df396cea.docx]

| **Characteristic**  **Supplementary Figure 2. Linear Regression Analysis of Factors Determining Chest Tube Duration** | **Univariable Analysis** | | | | **Multivariable Analysis** | | |
| --- | --- | --- | --- | --- | --- | --- | --- |
| **N** | **Beta** | **95% CI** | **p-value** | **Beta** | **95% CI** | **p-value** |
| Age | 69 | -0.146 | -0.408, 0.117 | 0.272 | -0.180 | -0.539, 0.179 | 0.317 |
| Sex | 69 |  |  |  |  |  |  |
| Female |  | — | — |  | — | — |  |
| Male |  | 2.912 | -3.798, 9.621 | 0.389 | 0.628 | -6.680, 7.937 | 0.863 |
| Smoker | 69 |  |  |  |  |  |  |
| Current |  | — | — |  | — | — |  |
| Former |  | -2.290 | -9.712, 5.132 | 0.540 | 3.637 | -5.340, 12.61 | 0.419 |
| **Never** |  | **8.786** | **-0.441, 18.01** | **0.062** | **17.36** | **6.176, 28.54** | **0.003** |
| Diabetes | 69 |  |  |  |  |  |  |
| No |  | — | — |  | — | — |  |
| Yes |  | -3.500 | -17.84, 10.84 | 0.628 | -1.796 | -17.29, 13.70 | 0.817 |
| BMI | 69 | -0.587 | -1.201, 0.026 | 0.060 | -0.550 | -1.210, 0.110 | 0.100 |
| Cell type | 69 |  |  |  |  |  |  |
| Adenocarcinoma |  | — | — |  | — | — |  |
| Benign |  | -6.780 | -35.94, 22.38 | 0.643 | -15.77 | -46.90, 15.36 | 0.313 |
| Carcinoid |  | -9.280 | -30.14, 11.58 | 0.377 | -12.55 | -33.15, 8.041 | 0.226 |
| Metastatic renal cell |  | -8.780 | -37.94, 20.38 | 0.549 | -8.089 | -38.02, 21.84 | 0.589 |
| Metastatic sarcoma |  | -11.78 | -40.94, 17.38 | 0.422 | -27.74 | -60.31, 4.819 | 0.093 |
| Necrotizing granuloma |  | 3.220 | -25.94, 32.38 | 0.826 | 1.558 | -28.37, 31.48 | 0.917 |
| NSCLC |  | 3.820 | -9.826, 17.47 | 0.578 | -1.165 | -15.32, 12.99 | 0.869 |
| Small cell |  | -6.780 | -35.94, 22.38 | 0.643 | -1.734 | -32.37, 28.90 | 0.910 |
| Squamous cell |  | 1.970 | -6.522, 10.46 | 0.644 | 0.985 | -7.773, 9.742 | 0.822 |
| Positive N2 disease | 69 |  |  |  |  |  |  |
| No |  | — | — |  | — | — |  |
| Yes |  | 1.103 | -7.475, 9.681 | 0.798 | -0.977 | -9.552, 7.597 | 0.820 |
| Surgery type | 69 |  |  |  |  |  |  |
| Open |  | — | — |  | — | — |  |
| **Robotic** |  | **-9.515** | **-15.81, -3.216** | **0.004** | -2.822 | -12.38, 6.732 | 0.555 |
| Surgical ligation | 69 |  |  |  |  |  |  |
| No |  | — | — |  | — | — |  |
| **Yes** |  | **13.17** | **6.507, 19.83** | **0.000** | 7.186 | -5.513, 19.88 | 0.261 |
| Octreotide | 69 |  |  |  |  |  |  |
| No |  | — | — |  | — | — |  |
| Yes |  | -5.513 | -13.04, 2.011 | 0.148 | 0.442 | -10.98, 11.86 | 0.938 |
| MCT diet | 69 | -5.363 | -13.39, 2.668 | 0.187 | -2.171 | -13.51, 9.172 | 0.702 |
| Lymphangiogram | 69 | 0.489 | -9.475, 10.45 | 0.922 | 0.330 | -13.05, 13.70 | 0.961 |
| Midodrine | 69 |  |  |  |  |  |  |
| No |  | — | — |  | — | — |  |
| **Yes** |  | **-10.07** | **-17.63, -2.506** | **0.010** | -2.500 | -13.19, 8.192 | 0.640 |
| TPN | 69 |  |  |  |  |  |  |
| No |  | — | — |  | — | — |  |
| Yes |  | 6.108 | -4.907, 17.12 | 0.272 | 3.121 | -11.50, 17.74 | 0.670 |
| Abbreviation: BMI=Body Mass Index: CI=Confidence Interval; MCT=medium chain triglyceride diet; NSCLC=non-small cell lung cancer; TPN=total parenteral nutrition | | | | | | | |
