# Supplementary material for: Practical Therapeutic Options for Postoperative Chylothorax
Source: Research Square preprint supplement (doi:10.21203/rs.3.rs-7919123/v1), 2026-01-22
Supplement: Supplementary file 3 [file 9244cd2ea22d987658ae590c.docx]

| **Characteristic**  **Supplementary Table 3. Linear Regression Analysis of Factors Determining Hospital Stay** | **Univariable Analysis** | | | | **Multivariable Linear Analysis** | | |
| --- | --- | --- | --- | --- | --- | --- | --- |
| **N** | **Beta** | **95% CI** | **p-value** | **Beta** | **95% CI** | **p-value** |
| Age | 69 | -0.186 | -0.461, 0.089 | 0.182 | -0.123 | -0.487, 0.241 | 0.500 |
| Sex | 69 |  |  |  |  |  |  |
| Female |  | — | — |  | — | — |  |
| Male |  | 1.452 | -5.630, 8.535 | 0.684 | -0.086 | -7.504, 7.332 | 0.981 |
| Smoker | 69 |  |  |  |  |  |  |
| Current |  | — | — |  | — | — |  |
| Former |  | -5.962 | -13.86, 1.934 | 0.136 | -0.582 | -9.693, 8.530 | 0.898 |
| Never |  | 3.500 | -6.317, 13.32 | 0.479 | 13.21 | 1.866, 24.56 | 0.023 |
| Diabetes | 69 |  |  |  |  |  |  |
| No |  | — | — |  | — | — |  |
| Yes |  | -6.962 | -21.96, 8.038 | 0.358 | -6.030 | -21.76, 9.699 | 0.444 |
| **BMI** | **69** | **-0.865** | **-1.493, -0.237** | **0.008** | **-0.736** | **-1.406, -0.066** | **0.032** |
| Cell type | 69 |  |  |  |  |  |  |
| Adenocarcinoma |  | — | — |  | — | — |  |
| Benign |  | -7.024 | -37.07, 23.03 | 0.642 | -14.29 | -45.89, 17.30 | 0.367 |
| Carcinoid |  | -9.524 | -31.02, 11.98 | 0.379 | -13.15 | -34.05, 7.750 | 0.212 |
| Metastatic renal cell |  | -9.024 | -39.07, 21.03 | 0.550 | -3.058 | -33.44, 27.32 | 0.840 |
| Metastatic sarcoma |  | -11.02 | -41.07, 19.03 | 0.466 | -23.79 | -56.84, 9.256 | 0.154 |
| Necrotizing granuloma |  | 17.98 | -12.07, 48.03 | 0.236 | 11.89 | -18.48, 42.26 | 0.435 |
| NSCLC |  | 3.576 | -10.49, 17.64 | 0.613 | -2.399 | -16.77, 11.97 | 0.738 |
| Small Cell |  | -4.024 | -34.07, 26.03 | 0.790 | 4.251 | -26.84, 35.34 | 0.784 |
| Squamous cell |  | 5.351 | -3.401, 14.10 | 0.226 | 4.288 | -4.601, 13.18 | 0.337 |
| Positive N2 disease | 69 |  |  |  |  |  |  |
| No |  | — | — |  | — | — |  |
| Yes |  | 1.350 | -7.665, 10.37 | 0.766 | -1.371 | -10.07, 7.332 | 0.753 |
| Surgery type | 69 |  |  |  |  |  |  |
| Open |  | — | — |  | — | — |  |
| **Robotic** |  | **-10.73** | **-17.28, -4.172** | **0.002** | -0.251 | -9.948, 9.446 | 0.959 |
| Surgical ligation | 69 |  |  |  |  |  |  |
| No |  | — | — |  | — | — |  |
| **Yes** |  | **14.21** | **7.251, 21.17** | **0.000** | 7.952 | -4.936, 20.84 | 0.221 |
| Octreotide | 69 |  |  |  |  |  |  |
| No |  | — | — |  | — | — |  |
| Yes |  | -7.895 | -15.69, -0.096 | 0.047 | -5.208 | -16.80, 6.386 | 0.371 |
| MCT diet | 69 |  |  |  |  |  |  |
|  | No | — | — |  | — | — |  |
|  | Yes | -6.463 | -14.87, 1.943 | 0.130 | -4.081 | -15.59, 7.430 | 0.479 |
| Lymphangiogram | 69 | 1.722 | -8.744, 12.19 | 0.744 | -0.274 | -13.85, 13.30 | 0.968 |
| Midodrine | 69 |  |  |  |  |  |  |
| No |  | — | — |  | — | — |  |
| Yes |  | -10.90 | -18.82, -2.973 | 0.008 | -0.189 | -11.04, 10.66 | 0.972 |
| TPN | 69 |  |  |  |  |  |  |
| No |  | — | — |  | — | — |  |
| Yes |  | 10.75 | -0.640, 22.13 | 0.064 | 5.598 | -9.242, 20.44 | 0.452 |
| Abbreviations: BMI=Body Mass Index: CI = Confidence Interval MCT=medium chain triglyceride diet; NSCLC=non-small cell lung cancer; TPN=total parenteral nutrition | | | | | | | |
